# Supplementary material for: Pregnancy and neonatal outcomes of twin pregnancies – the role of maternal age
Source: publisher site journal article supplement (doi:10.1515/jpm-2020-0386), 2021-02-18
Supplement: Supplementary file 1 [file j_jpm-2020-0386_suppl.docx]

**Table S1.** Comparison of baseline maternal characteristics between advanced maternal age groups.

| **Characteristic** | **35-39 (n=302)** | **≥40(n=90)** | **p-Value** |
| --- | --- | --- | --- |
| BMI at term, kg/m2 | 29.4 (26.2-32.4) | 29.0 (26.5-31.6) | 0.931 |
| Chronic hypertension | 2 (0.7) | 2 (2.2) | 0.227 |
| Pre-gestational DM | 0 (0.0) | 1 (1.1) | 0.230 |
| Previous pregnancy | 237 (78.5) | 73 (81.1) | 0.590 |
| Previous delivery | 207 (68.5) | 56 (62.2) | 0.263 |
| IVF pregnancy | 162 (52.6) | 58 (64.4) | 0.070 |

Data are presented in n (%) or median (interquartile range). BMI, body mass index; DM, diabetes mellitus; IVF, *in vitro* fertilization.

**Table S2.** Comparison of pregnancy and delivery outcomes between advanced maternal age groups.

| **Outcome** | **35-39 (n=302)** | **≥40 (n=90)** | **p-Value** |
| --- | --- | --- | --- |
| **Pregnancy complications** |  |  |  |
| Placental abruption | 4 (1.3) | 0 (0.0) | 0.578 |
| Gestational hypertension | 13 (4.3) | 7 (7.8) | 0.189 |
| Preeclampsia | 22 (7.3) | 9 (10.0) | 0.404 |
| GDM | 30 (9.9) | 10 (11.1) | 0.746 |
| Intrahepatic cholestasis of pregnancy | 5 (1.7) | 3 (3.3) | 0.392 |
| IUFD | 2 (0.7) | 0 (0.0) | 1.0 |
| **Preterm delivery, weeks of gestation** |  |  |  |
| <32 | 13 (4.3) | 5 (5.6) | 0.575 |
| <34 | 40 (13.2) | 8 (8.9) | 0.268 |
| <37 | 153 (50.7) | 38 (42.2) | 0.160 |
| **Delivery outcome** |  |  |  |
| GA at delivery, weeks | 36.0 (35.0-37.0) | 37.0 (35.0-38.0) | 0.404 |
| **Mode of delivery** |  |  |  |
| Spontaneous vaginal | 106 (35.1) | 31 (34.4) | 0.935a |
| Operative vaginal | 11 (3.7) | 2 (2.2) |
| Cesarean delivery | 185 (61.3) | 57 (63.3) |

Data are presented in n (%) or median (interquartile range). Definitions: Intrahepatic cholestasis of pregnancy- the presence of pruritus associated with elevated total serum bile acids levels and/or aminotransferases and the absence of diseases that may produce similar laboratory findings and symptoms. GDM, gestational diabetes mellitus; IUFD, intrauterine fetal death; GA, gestational age; NA, not applicable. aSignificance between group B and group C only.

**Table S3.** Comparison of neonatal outcomes between advanced maternal age groups.

| **Characteristic** | **35-39 (n=302)** | **≥40 (n=90)** | **p-Value** |
| --- | --- | --- | --- |
| **Neonatal outcome** |  |  |  |
| Birthweight, g | 2208±507 | 2251±459 | 0.475 |
| Small for gestational age | 45 (14.9) | 8 (8.9) | 0.148 |
| **Birth weight category** |  |  |  |
| <1500 g | 31 (10.3) | 6 (6.7) | 0.309 |
| <2500 g | 223 (73.8) | 61 (67.8) | 0.259 |
| 5-min Apgar score less than 7 | 14 (4.6) | 2 (2.2) | 0.321 |
| Twin discordancy, 20% + | 80 (26.5) | 16 (17.8) | 0.094 |

Data are presented in n (%) or median (interquartile range).
